# Supplementary material
Source: PubMed Central journal article supplement (PMC1965552)

**a**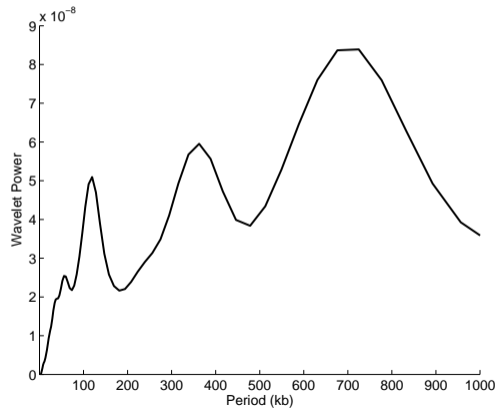**b**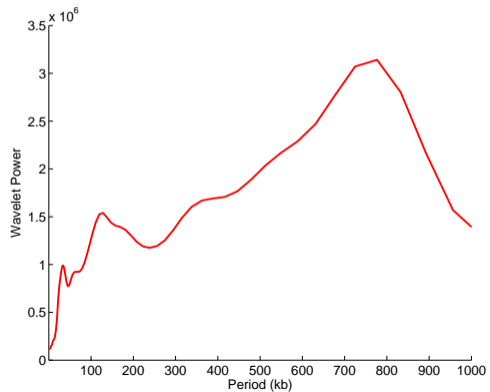**c**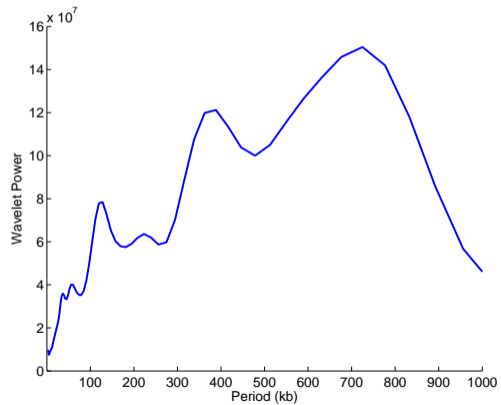

Supplement: pnas_0610776104_8.pdf [file pnas_0610776104_8.pdf]
